1 **FRONT MATTER**

2 **Title**

3 Aperiodic EEG activity masks the dynamics of neural oscillations during loss of  
4 consciousness from propofol

5 **Authors**

6 Niklas Brake<sup>1,2</sup>, Flavie Duc<sup>3</sup>, Alexander Rokos<sup>4</sup>, Francis Arseneau<sup>5</sup>, Shiva Shahiri<sup>6</sup>, Anmar  
7 Khadra<sup>2\*</sup>, Gilles Plourde<sup>3\*</sup>

8 **Affiliations**

9 <sup>1</sup>Quantitative Life Sciences PhD Program, McGill University, Montreal, Canada.

10 <sup>2</sup>Department of Physiology, McGill University, Montreal, Canada.

11 <sup>3</sup>Department of Anesthesia, McGill University, Montreal, Canada.

12 <sup>6</sup>School of Nursing, McGill University, Montreal, Canada.

13 <sup>4</sup>School of Medicine, University College Cork, Cork, Ireland.

14 <sup>5</sup>Innodem Neurosciences, Montréal, Canada.

15 \*Correspondence: [anmar.khadra@mcgill.ca](mailto:anmar.khadra@mcgill.ca), [gilles.plourde@mcgill.ca](mailto:gilles.plourde@mcgill.ca).

16 **Abstract** (150/150 words)

17 EEGs are known to provide biomarkers for consciousness. Although EEG correlates of loss  
18 of consciousness (LOC) are often ascribed to changes in neural synchrony, mounting  
19 evidence suggests that some changes result from asynchronous neural activity. By  
20 combining EEG recordings of humans undergoing propofol administration with biophysical  
21 modelling, we present here a principled decomposition of EEG changes during LOC into  
22 synchronous and asynchronous sources. Our results reveal that IPSP decay rate and mean  
23 spike rate shape aperiodic EEG features, and that propofol's effects on these parameters  
24 largely explain the changes in EEG spectra following propofol infusion. We further show  
25 that traditional spectral EEG analysis likely conflates these effects with changes in rhythmic  
26 activity, thereby masking the true dynamics of neural synchrony. We conclude that the  
27 well-documented propofol-induced alpha rhythm in fact appears before LOC, and that the  
28 moment of LOC is uniquely correlated with the sudden appearance of a delta rhythm.

29

30 **MAIN TEXT**

31

32 **Introduction**

33 General anesthesia, a drug-induced state of unconsciousness, is characterized by changes in  
34 the EEG. Slow rhythms (< 4 Hz) are a ubiquitous feature of general anesthesia, being  
35 readily induced in humans by propofol, sevoflurane, thiopental, and xenon (Guingo et al.,  
36 2001; Murphy et al., 2011; Lewis et al., 2012; Purdon et al., 2013; Akeju et al., 2014;  
37 Huupponen et al., 2008; Ma and Leung, 2006; Johnson et al., 2003), potentially indicating a  
38 universal signature of unconsciousness bridging both general anesthesia and sleep (Amzica  
39 and Steriade, 1998; Steriade, 2000; Le Masson et al., 2002). Nonetheless, each anesthetic  
40 produces its own characteristic spectral signatures. Most notably, propofol induces a frontal  
41 alpha rhythm (8-15 Hz) distinct from any rhythms observed in sleep (Guingo et al., 2001;  
42 Feshchenko et al., 2004; Murphy et al., 2011; Ching et al., 2010; Purdon et al., 2013; Akeju  
43 et al., 2014). Although it has been suggested that this rhythm plays an important role in  
44 propofol's function as a general anesthetic (Ching et al., 2010, Purdon et al., 2013; Soplata  
45 et al., 2017), intracranial LFP recordings indicate that propofol-induced LOC is only  
46 coincident with a sharp increase in low-frequency (<3 Hz) power (Lewis et al., 2012). Thus,  
47 whether these alpha rhythms play a causal role in propofol's effects on consciousness  
48 remains unclear.

49 The existence of neural rhythms in EEG is primarily quantified using spectral analysis  
50 techniques, such as the spectrogram (Prerau et al., 2016). Peaks in these spectra thus  
51 indicate the presence of a neural rhythm (Steriade, 2001; Buzsáki and Draguhn, 2004).  
52 However, EEG spectra display not only peaks, but also an overall trend that decays with  
53 frequency – variously referred to as the 1/f background, asynchronous, aperiodic,  
54 arrhythmic, scale-free, or noise component of the signal (Bédard et al., 2006; Miller et al.,  
55 2009; He, 2014; Donoghue et al., 2020). It has been recently suggested that this trend may  
56 change independently of neural rhythms and that, consequently, changes in frequency-band  
57 power over time may not necessarily reflect differences in neural oscillations (Donoghue et  
58 al., 2020). Understanding how and why this trend might change is critical to inferring the  
59 existence and dynamics of neural rhythms from EEG data.

60 Recent computational modelling predicted that the spectral trend between 30-50 Hz  
61 depends on the average ratio of excitatory and inhibitory synaptic activity, which could be  
62 altered by propofol through its potentiation of GABA receptors (Gao et al., 2017).  
63 Corroborating this prediction, several recent studies have reported a steeper spectral slope in  
64 this frequency range during propofol-induced anesthesia compared to wakefulness (Gao et  
65 al., 2017; Colombo et al., 2019; Lendner et al., 2020). These studies have also reported  
66 differences in the spectral slope in the 1-40 Hz range (Colombo et al., 2019; Ledner et al.,  
67 2020) which, critically, overlaps with the frequencies of propofol-induced neural  
68 oscillation, including alpha and delta rhythms. We hypothesized that changes in  
69 asynchronous neural activity may act as a confounding variable in traditional analysis  
70 techniques when identifying alpha and delta rhythms during propofol-induced LOC.

71 The goal of this study was to determine how propofol alters the broadband (0.5-100  
72 Hz) aperiodic properties of the EEG, and investigate what implications this may have for

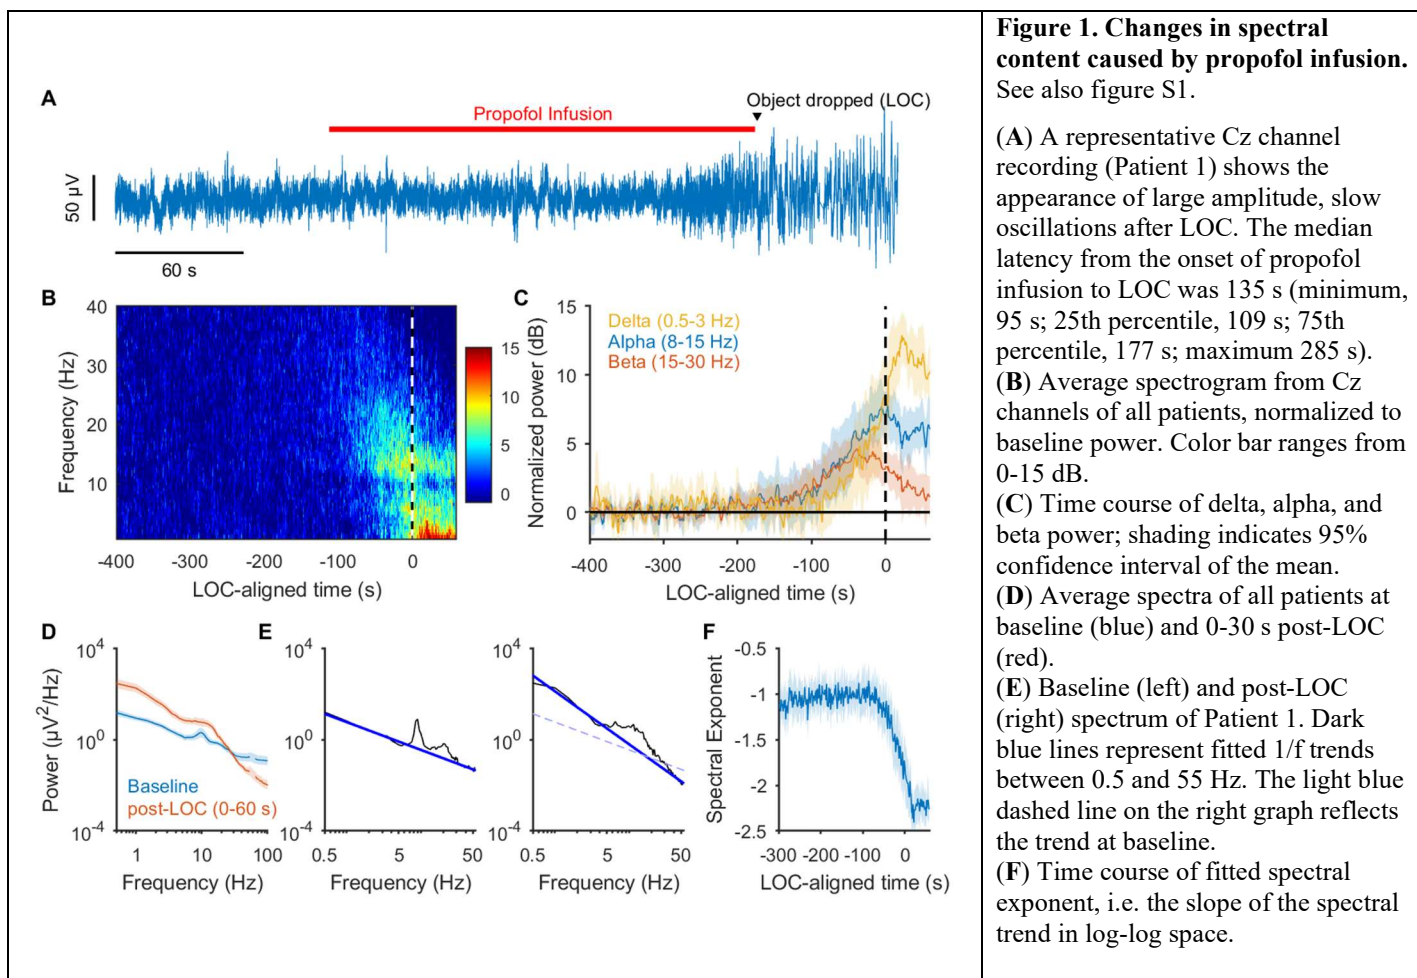

73 interpreting changes in neural rhythms. To this end, we recorded the EEG of 14 human  
 74 subjects undergoing a fixed-rate infusion of propofol. We then derived a biophysical model  
 75 of asynchronous neural activity and its influence on spectral EEG properties. This model  
 76 allowed us to infer changes in the aperiodic components of our EEG recordings  
 77 simultaneously with changes in neural oscillations. Overall, this study identifies specific  
 78 physiological parameters that shape the broadband spectral trend in EEG signals, proposes a  
 79 new method for detrending EEG power spectra, and provides further insight into the  
 80 mechanisms of propofol-induced LOC.

## 82 Results

### 83 Fixed rate propofol infusion replicates known EEG markers of LOC

84 To assess neural changes during the transition between wakefulness and unconsciousness,  
 85 we recorded the EEG of 14 patients during a fixed-rate infusion of propofol (of 1  
 86 mg/kg/min) lasting until LOC (Figure 1A). The moment of LOC was identified by the  
 87 dropping of a held object, which has been shown to provide an accurate, binary measure for  
 88 LOC (Guay and Plourde, 2019; Cummings et al., 1984). The median LOC-aligned  
 89 spectrogram was calculated from the Cz channel, revealing the emergence of power within

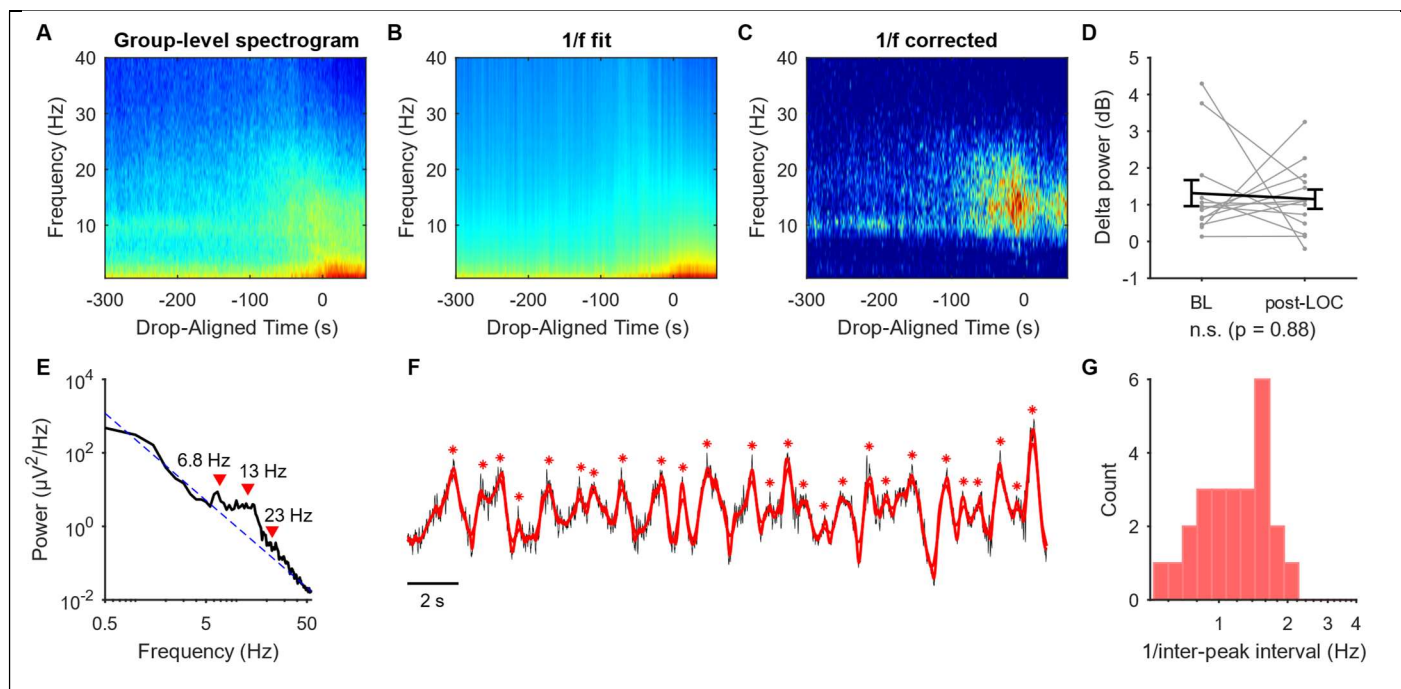

**Figure 2. The 1/f trend in EEG spectra conflates rhythmic and aperiodic power.** See also figures S2. (A) Raw group-level averaged spectrogram. (B) Group-averaged 1/f fits. (C) Average spectrogram with fitted 1/f background trend removed. (D) Delta power, after 1/f trend removed, at baseline (BL) and 0-60 s post-LOC. Grey lines indicate individual subjects, error bars are mean  $\pm$  SE; a sign test indicates that there is no significant difference change in delta power following LOC ( $p=0.88$ ). (E) An example spectrum post-LOC with a fitted 1/f trend. Peaks at 6.8 Hz, 13 Hz, and 23 Hz were identified using the FOOOF package (Donoghue et al., 2020). (F) Time series corresponding to the power spectrum shown in panel E (black) as well as the same time series low-pass filtered at 6 Hz (red). Red asterisks indicate peaks in the filtered signal. (G) A histogram of the frequency of peaks in panel F, defined as the reciprocal of inter-peak intervals.

90 the delta (0.5-3 Hz), alpha (8-15 Hz), and beta (15-30 Hz) frequency ranges (Figure 1B, C).  
 91 Power in each frequency band started to increase at the same time, but began to decline at  
 92 distinct times. Beta power began decreasing prior to LOC, while alpha and delta power  
 93 peaked at or after the moment of LOC (Figure 1C). Similar results were obtained from other  
 94 electrode locations (Figure S1). These observations suggest that LOC from propofol is  
 95 associated with the appearance of alpha and delta rhythms, but not beta rhythms, in  
 96 agreement with past studies (Guingo et al., 2001; McCarthy et al., 2008; Ching et al., 2010;  
 97 Murphy et al., 2011; Purdon et al., 2013).

98 To investigate changes in spectral trend, we first compared the power spectra at  
 99 baseline to that following LOC (0-60 s after the object was dropped). This showed a  
 100 steepening in the power spectrum around approximately 25 Hz (Figure 1D), consistent with  
 101 several recent studies (Gao et al., 2017; Colombo et al., 2019; Ledner et al., 2020). To  
 102 quantify this observation, we estimated the spectral exponent between 0.5 and 55 Hz using  
 103 the FOOOF algorithm (Donoghue et al. 2020) (Figure 1E). Based on this analysis, we found  
 104 that that the baseline spectral exponent of  $-0.93 \pm 0.07$  ( $n = 14$ ) decreased to  $-2.24 \pm 0.12$   
 105 following LOC ( $p < 10^{-6}$ , paired t-test). To resolve changes in spectral slope over time, we  
 106 estimated the 1/f trend of the power spectra in 2 second windows; here, we observed a sharp  
 107 increase in the magnitude of the spectral exponent prior to LOC, followed by a plateau after

108 LOC (Figure 1F). These results corroborate past observations and further demonstrate that  
109 changes in the spectral slope are tightly correlated with the moment of LOC.

### 110 111 **1/f trend does not necessarily reflect asynchronous activity**

112 It has been previously proposed that the 1/f trend present in EEG spectra reflects aperiodic  
113 neural activity, while the bumps above this trend reflect power from neural oscillations  
114 (Donoghue et al., 2020). Accordingly, fitting a spectral slope may be interpreted as a  
115 specific decomposition of the EEG spectrum into periodic and aperiodic power (Donoghue  
116 et al., 2020). The foregoing analyses thus provide distinct interpretations of the data; whereas  
117 the narrowband analysis indicated a drastic increase in delta rhythms (Figure 1C), the  
118 spectral slope analysis classified this power as aperiodic (Figure 1E; Figure 2A-C) and thus  
119 did not indicate any significant change in delta rhythms between baseline and post-LOC  
120 (Figure 2D). However, this conclusion goes contrary to the inspection of the time series,  
121 which clearly showed the appearance of large amplitude, slow rhythmic oscillations  
122 following LOC (Figure S2).

123 Figures 2E-G exemplify the foregoing issue. Figure 2E depicts a power spectrum that  
124 was well fit by a 1/f function, indicating no neural oscillations below 6 Hz (Figure 2E).  
125 Nevertheless, the corresponding time series displayed slow oscillations (Figure 2F).  
126 Algorithmically identifying peaks in the time series after low pass filtering below 6 Hz  
127 revealed peaks that occurred with a frequency between 0.5-2 Hz, consistent with the  
128 existence of a delta rhythm (Figure 2F, G). It follows that a large fraction of the low  
129 frequency power in this spectrum is produced by a delta rhythm, and that the 1/f trend in the  
130 spectrum conflates both rhythmic and aperiodic power. Similar analyses of other patients  
131 revealed an obvious increase in delta rhythms following LOC in 13 out of 14 patients, while  
132 an increase in delta power was only present in 3 out of 14 spectra following 1/f detrending  
133 (Figure S2). These results suggested that the empirical 1/f trend is not an appropriate model  
134 for aperiodic EEG power, and furthermore questioned whether the aperiodic component  
135 does indeed change following propofol infusion, or whether the perceived differences in 1/f  
136 trend simply reflects changes in rhythmic oscillations, such as increases in delta rhythms  
137 and/or decreases in gamma rhythms (Purdon et al., 2013).

### 138 139 **A model of asynchronous neural activity**

140 To investigate whether propofol changes the aperiodic component of the EEG, we  
141 developed a biophysical model for the contributions of asynchronous neural activity to the  
142 extracellular electric field. Our goal was to both determine whether it was reasonable to  
143 ascribe EEG power to such activity and to derive an analytical expression that could be used  
144 to detrend our EEG spectra under specific physiological assumptions.

145 In Notes S1 and S2, we derived the contributions of asynchronous neural activity to  
146 the EEG. Briefly, the model described the expected electric field generated by random,  
147 uncorrelated Poissonian synaptic activity, including inhibitory and excitatory post-synaptic  
148 potentials (IPSPs and EPSPs) (see Note S1), as well as action potentials (APs) propagating  
149 along ascending cortical afferent fibers (Figure 3A) (see Note S2). As a consequence of the

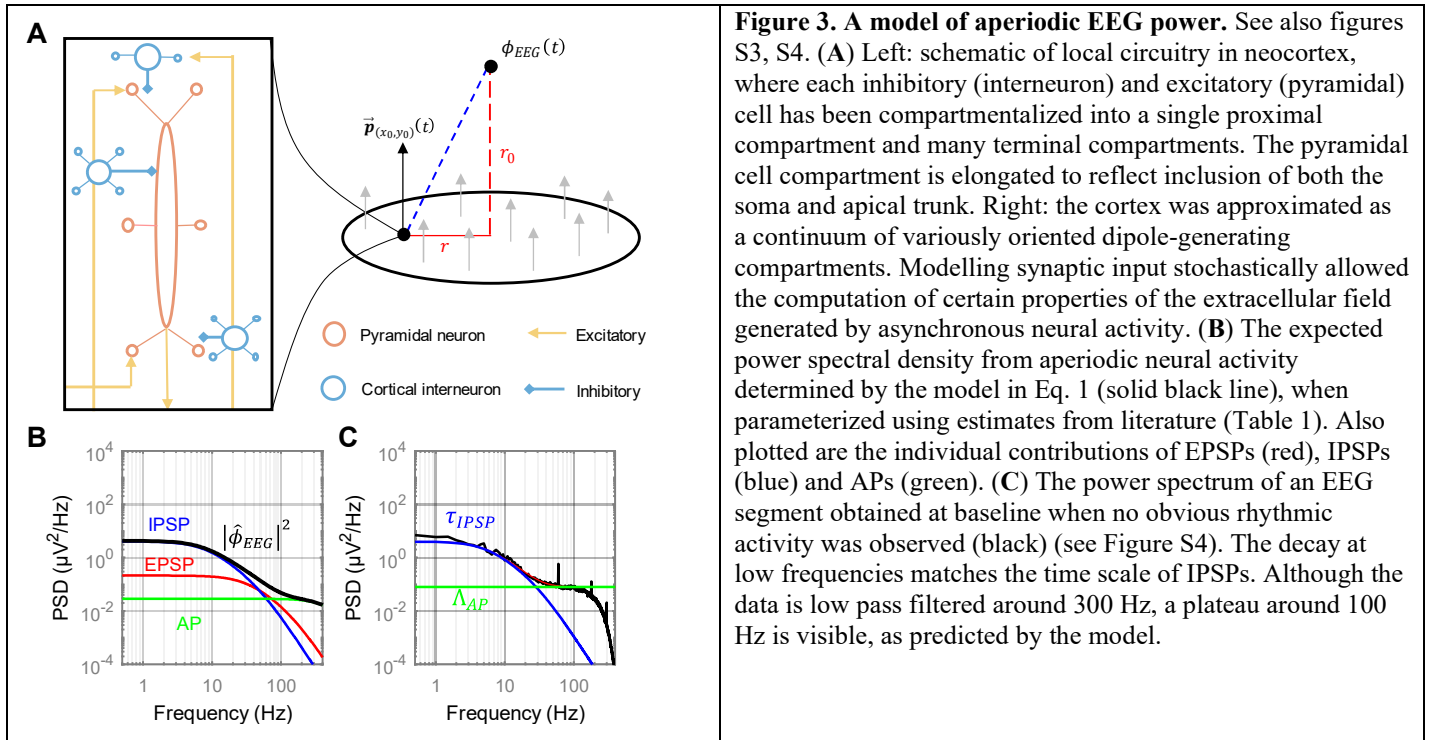

linearity of electric fields, we found that under specific assumptions, the EEG signal could be described by the following equation

$$\phi_{EEG}(t) = (\alpha_E * W_E)(t) + (\alpha_I * W_I)(t) + (\alpha_{AP} * W_{AP})(t).$$

In this formalism,  $\alpha_x$  represent the responses of the EEG to a single electrical event of each type ( $x = E, I,$  and  $AP$ ), while  $W_x$  are stationary Gaussian processes with mean,  $\mu_x$ , and variance,  $\sigma_x^2$ . Due to the asynchronicity of synaptic activity, the mean value for  $W_E$  and  $W_I$  were determined to be 0 (see Note S1). Critically, however, the variances of these Gaussian processes were not 0, and indeed could be calculated as follows

$$\sigma_E^2 = \frac{(d_0^2 + d_1^2)^2 \rho_N N_E \lambda_E}{96\pi\sigma^2 R_a r_0^2}, \quad \sigma_I^2 = \frac{(d_0^2 + d_1^2)^2 \rho_N N_I \lambda_I}{96\pi\sigma^2 R_a r_0^2}, \quad \sigma_{AP}^2 = \frac{d_{AP}^4 \lambda_{AP} \rho_N N_{AP}}{768\pi\sigma^2 R_a^2 r_0^2}.$$

Here,  $d_0$  and  $d_1$  are the average diameters of distal and proximal dendrites, respectively, in the cortex,  $\rho_N$  is the density of cells in the cortex,  $N_E$  and  $N_I$  are the total numbers of excitatory and inhibitory synapses per cell in terminal dendrite segments,  $\lambda_E$  and  $\lambda_I$  are the rates of spontaneous activation for single excitatory and inhibitory synapses,  $\lambda_{AP}$  is the rate of spontaneous action potential firing along afferent fibers,  $N_{AP}$  are the total number these fibers for each cortical cell,  $R_a$  is the axial resistance of cytoplasm,  $\sigma$  is the conductivity of the extracellular space, and  $r_0$  is the minimum distance between the electrode and the cortex (see also Table 1).

Because activity was assumed to be uncorrelated, the computed expected power spectrum was found to be

$$\mathbb{E}|\hat{\phi}_{EEG}(f)|^2 = |\hat{\alpha}_E|^2 \mathbb{E}|\hat{W}_E|^2 + |\hat{\alpha}_I|^2 \mathbb{E}|\hat{W}_I|^2 + |\hat{\alpha}_{AP}|^2 \mathbb{E}|\hat{W}_{AP}|^2$$

**Table 1. Parameters values for model**

| Parameter (units)                  | Value                | Description                      | Reference                      |
|------------------------------------|----------------------|----------------------------------|--------------------------------|
| $r_0$ (mm)                         | 20                   | Scalp-cortex distance            | Stokes et al. 2005             |
| $\sigma$ (S/mm)                    | $5 \times 10^{-6}$   | Volume conductivity              | Cosandier-Rimele et al. 2007   |
| $R_a$ ( $\Omega$ mm)               | 2000                 | Axial resistivity                | Eyal et al. 2016               |
| $\rho_N$ (cells/mm <sup>2</sup> )  | $0.2 \times 10^6$    | Cortical cell density            | Markham et al. 2015            |
| $N_E$ (synapses/cell)              | 7,500                | No. terminal excitatory synapses | See methods.                   |
| $\lambda_E$ (Hz)                   | 0.15                 | Spontaneous EPSP rate / synapse  | Manns et al. 2004              |
| $\gamma_E$ ( $\mu$ V)              | 1000                 | EPSP amplitude                   | Williams & Stuart 2002         |
| $\tau_E^{rise}$ (s)                | $1 \times 10^{-3}$   | EPSP rise time                   | Williams & Stuart 2002         |
| $\tau_E^{decay}$ (s)               | $5 \times 10^{-3}$   | EPSP decay time                  | Williams & Stuart 2002         |
| $d_0$ (mm)                         | $1 \times 10^{-3}$   | Terminal dendrite diameter       | Benavides-Piccione et al. 2020 |
| $d_1$ (mm)                         | $3.3 \times 10^{-3}$ | Proximal dendrite diameter       | Benavides-Piccione et al. 2020 |
| $N_I$ (synapses/cell)              | 2,000                | No. terminal inhibitory synapses | See methods.                   |
| $\lambda_I$ (Hz)                   | 1.8                  | Spontaneous IPSP rate / synapse  | Gentet et al. 2012             |
| $\gamma_I$ ( $\mu$ V)              | 750                  | IPSP amplitude                   | Larkum et al., 1999            |
| $\tau_I^{rise}$ (s)                | $3 \times 10^{-3}$   | IPSP rise time                   | Thomson et al., 1996           |
| $\tau_I^{decay}$ (s)               | $20 \times 10^{-3}$  | IPSP decay time                  | Thomson et al., 1996           |
| $N_{AP}$ (afferents/cells)         | 8,500                | No. (afferent) axons/cell        | See methods.                   |
| $C_m$ (F/mm <sup>2</sup> )         | $0.9 \times 10^{-8}$ | Membrane capacitance             | Gentet et al., 2000            |
| $R_m$ ( $\Omega$ mm <sup>2</sup> ) | $0.2 \times 10^6$    | Axonal membrane resistivity      | Arancibia-Cárcamo et al. 2017  |
| $\lambda_{AP}$ (Hz)                | 0.5                  | Spontaneous AP rate              | Manns et al. 2004              |
| $d_{AP}$ (mm)                      | $0.7 \times 10^{-3}$ | Axonal diameter                  | Arancibia-Cárcamo et al. 2017  |
| $\gamma_{AP}$ ( $\mu$ A/mm)        | 0.9                  | AP current density               | See methods.                   |
| $\tau_{AP}^1$ (s)                  | $0.6 \times 10^{-3}$ | Current time constant 1          | See methods.                   |
| $\tau_{AP}^2$ (s)                  | $0.4 \times 10^{-3}$ | Current time constant 2          | See methods.                   |

$$= \sum_{x \in \{I, E, AP\}} \Lambda_x |\hat{\alpha}_x|^2,$$

where  $\Lambda_x := \mathbb{E}|\widehat{W}_x(f)|^2 = \sigma_x^2/2\pi$ , with

$$\hat{\alpha}_x(f) = \gamma_x((2\pi i f + 1/\tau_x^{decay})^{-1} - (2\pi i f + 1/\tau_x^{rise})^{-1}),$$

for  $x = E$  and  $I$ . The equation  $\hat{\alpha}_{AP}(f)$  in general could not be analytically computed, but the numerically computed power spectrum is shown in Figure S3.

Parameterizing Eq. 1 with values obtained from the literature (Table 1) produced the power spectrum shown in Figure 3B. Interestingly, this parameterization predicted that low frequency power is predominantly produced by inhibitory neurotransmission, while high frequency power is primarily shaped by AP activity (Figure 3B). At lower frequencies, the contributions of IPSPs dominated as a result of their higher frequency of occurrence and slower time scales compared to EPSPs (Table 1); these parameters compensated for the lower density of inhibitory synapses at dendritic tips. On the other end of the spectrum, the fast time scales of APs led to a frequency response largely greater than  $\sim 100$  Hz (Figure 3B, Figure S3), and were thus not relevant for understanding aperiodic power in the frequency

184 range of neural oscillations (Figure 3B). Together, these observations suggested that the  
185 following reduced model, given by  $|\hat{\phi}_{EEG}(f)|^2 = \Lambda_I |\hat{a}_I(f; \tau_I^{rise}, \tau_I^{decay})|^2 + \Lambda_{AP}$ , would  
186 suffice to capture the aperiodic component of the EEG spectrum. Indeed, this simplified  
187 equation succeeded in capturing the spectrum obtained from one of the patients who did not  
188 display obvious rhythmic activity on their EEG prior to propofol infusion (Figure 3C;  
189 Figure S4).

190 To understand how aperiodic power interacts with that from synchronous neural  
191 oscillations, we returned to our model derivation and, instead of considering purely  
192 asynchronous activity, electrical events were made to follow cyclic Poisson processes (see  
193 Note S3). Doing so led to an expression identical to Eq. 1, except for the replacement of  $\Lambda_x$   
194 ( $x = I, E$ , and  $AP$ ) by  $\Lambda_x(1 + b \cdot g(f))$ , where  $g(f)$  is a probability density function  
195 describing the frequency of fluctuations in firing rate (e.g. Figure 2G) and  $b$  is a scaling  
196 factor related to both the fraction of neurons participating in the rhythm as well as the  
197 degree to which the rhythm modulates their firing frequency. This equation extends linearly  
198 to  $\Lambda_x(1 + \sum_i b_i \cdot g_i(f))$  in the presence of multiple modulatory rhythms. Based on this, we  
199 can arrive at the following, simplified model of an EEG spectrum:

$$|\hat{\phi}_{EEG}(f)|^2 = \Lambda_{AP} + \Lambda_I \left( 1 + \sum_{i=1}^3 b_i \cdot g_i(f; \mu_i, \sigma_i^2) \right) |\hat{a}_I(f; \tau_I^{rise}, \tau_I^{decay})|^2 \quad (\text{Eq. 2})$$

## 200 201 **Model predicts mechanism for spectral steepening following propofol infusion**

202 If the proposed model given by Eq. (2) is valid, we should be able to determine which  
203 parameters are responsible for the changes in the EEG power spectra during LOC. To  
204 accomplish this, we first fitted the model to the averaged spectra at baseline and at 0-60 s  
205 post-LOC. The model fitted the data well (e.g. Figure 4A), and produced estimates for IPSP  
206 time constants at baseline consistent with expectations ( $\tau_I^{decay}$ :  $15.7 \pm 0.9$  ms;  $\tau_I^{rise}$ :  $2.3 \pm$   
207  $0.3$  ms). Comparing parameter estimates between baseline and post-LOC revealed  
208 significant differences in the parameters  $\tau_I^{decay}$ ,  $\Lambda_I$ , and  $\Lambda_{AP}$  (Figure 4B-D). Specifically,  
209  $\tau_I^{decay}$  increased to  $40.0 \pm 2.5$  ms ( $n = 13$ ,  $p < 10^{-6}$ ; paired two-tailed t-test), indicating a  
210 slowing of IPSP decay of about 150%. Interestingly, this estimate is consistent with  
211 experimental observations of propofol's effect on inhibitory synaptic currents (Orser et al.  
212 1994; Whittington et al., 1996; Kitamura et al., 2013). The scaling factor  $\Lambda_I$  increased by  
213 about 40% (median fold change: 1.37;  $p = 0.034$ , sign test), which might suggest an  
214 increase in IPSP amplitude; however since both frequency and amplitude affect this scaling  
215 factor, it was not possible to discern how much each component was contributing to this  
216 change. Finally,  $\Lambda_{AP}$  decreased by about 70% (median fold change: 0.29,  $p < 10^{-3}$ , sign test).  
217 This decrease reflects a drop in background cortical input and agrees well with the 50-90%  
218 decrease in mean firing rate reported *in vivo* across cortex and thalamus (Redinbaugh et al.,  
219 2020; Bastos et al., 2021). Overall, these results validated our predictions and established  
220 the model as a plausible framework to characterizing aperiodic EEG power.



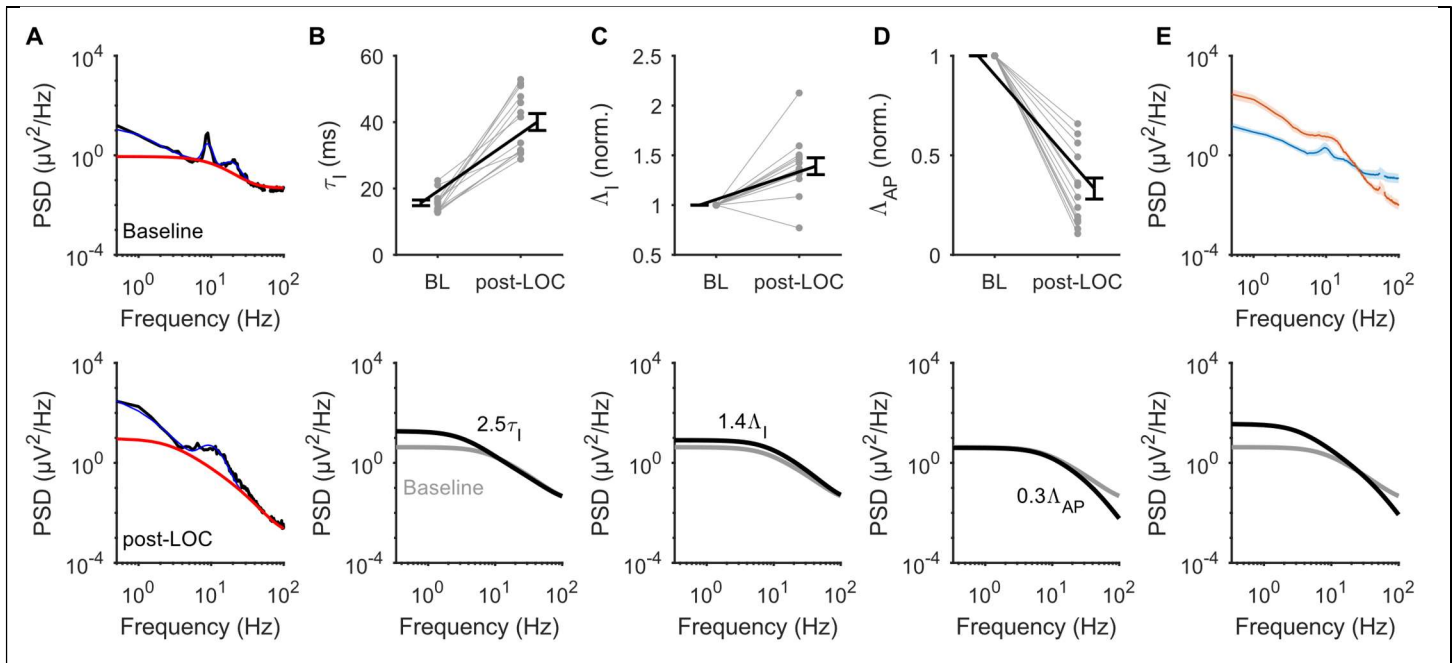

**Figure 4. Estimated neural parameters before and after LOC from propofol.** See also figure S5 (A) Example of model fits to average baseline and post-LOC spectrum of Patient 1. Blue lines reflect the full model fit, whereas the red lines indicate the aperiodic component, i.e. Eq. 2 with  $b_i = 0$  for all  $i$ . (B) Top: Estimated decay time of IPSPs ( $\tau_i^{decay}$ ) at baseline (BL) and post-LOC. Bottom: Grey is the model outcome depicted in Figure 3B. The black line represents the model outcome after increasing the decay time of IPSPs 2.5-fold. (C) Same as panel B, but for the scaling factor of IPSPs ( $\Lambda_I$ ). (D) Same as panels B and C, but for the scaling factor of APs ( $\Lambda_{AP}$ ). (E) Top: Average power at baseline (blue) and post-LOC (red). Shading indicates 95% confidence interval of the mean. Bottom: The black line depicts change in modelled aperiodic power after increasing  $\tau_i^{decay}$  2.5-fold and decreasing  $\Lambda_{AP}$  by 70%.

221 We next asked what impact the changes in  $\tau_i^{decay}$ ,  $\Lambda_I$ , and  $\Lambda_{AP}$  should have on the  
 222 EEG power spectrum. To answer this question, we considered the original model, given by  
 223 Eq. (1), parameterized with values from the literature (Figure 3B). With this model, we  
 224 found that slowing the decay of IPSPs by 150% and increasing their amplitude by 40% led  
 225 to an increase in power at lower frequencies (Figure 4B, C). Meanwhile, decreasing the  
 226 firing rate of APs by 70% led to a decrease in power across all frequencies, with a stronger  
 227 effect on higher frequencies (Figure 4D). Modifying the IPSP parameters and the AP firing  
 228 rate simultaneously led to a rotation of the predicted aperiodic power spectrum in a manner  
 229 almost identical to that observed experimentally (Figure 4E). Altogether, these results  
 230 indicated that propofol's known potentiation of IPSPs and suppression of neuronal spiking  
 231 are theoretically sufficient to cause a rotation of the EEG power spectrum without any  
 232 changes to neural synchrony.

### 233 234 **Moment of LOC is uniquely correlated with the appearance of delta rhythms**

235 Our results thus far suggest that not all propofol-induced spectral changes should be  
 236 ascribed to differences in neural synchrony. Consequently, a spectral analysis that is  
 237 normalized to baseline power may be systematically misattributing certain spectral changes  
 238 to differences in synchronous rhythms. Our next goal was to estimate changes in neural

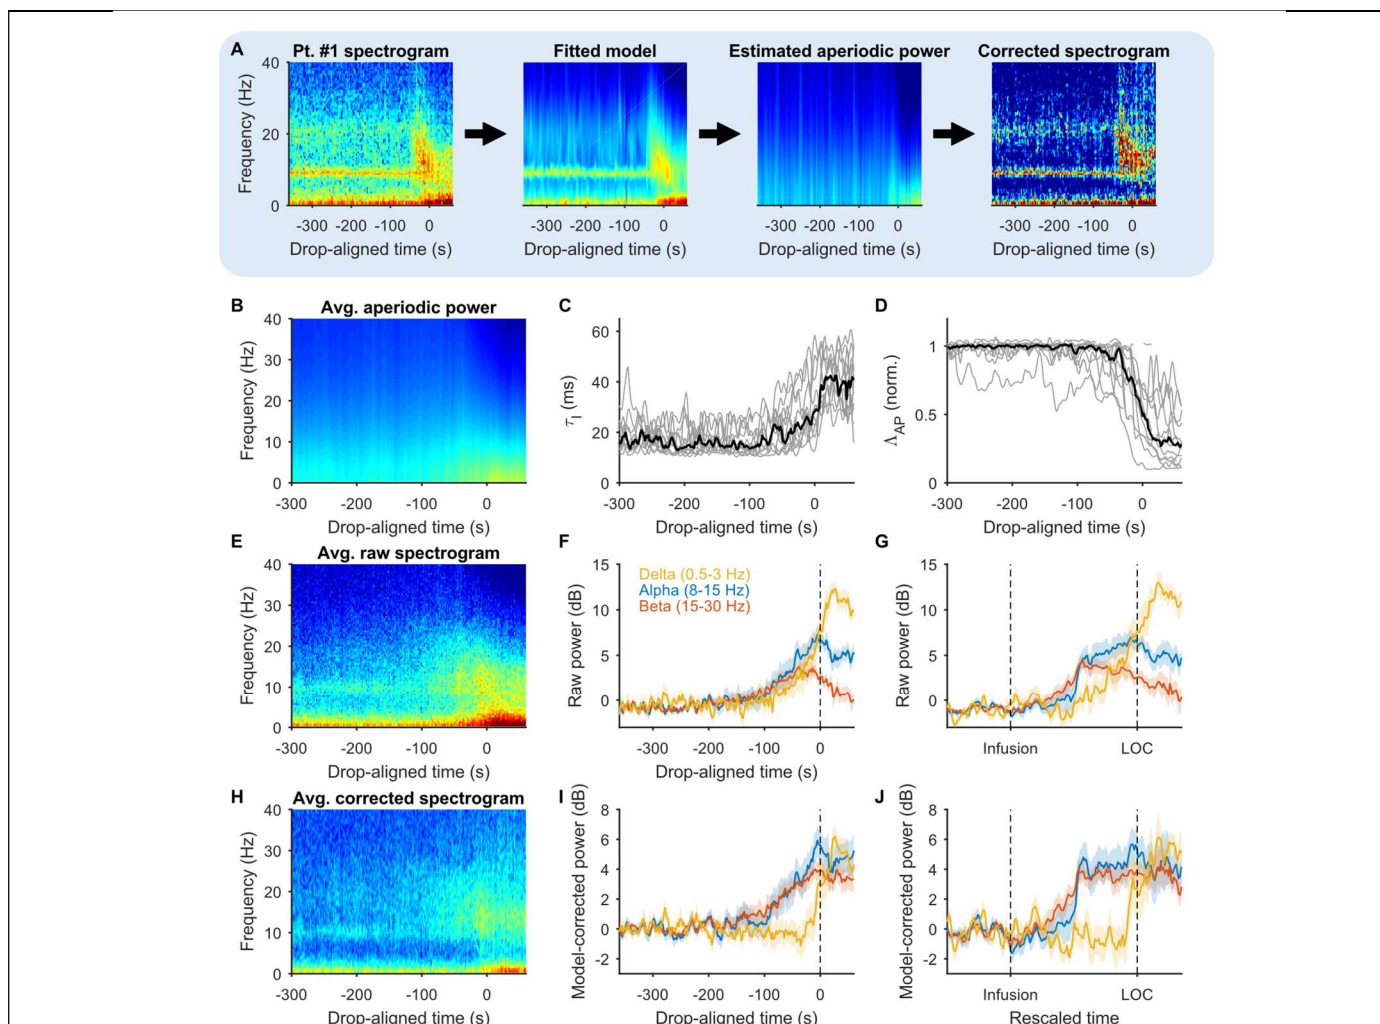

**Figure 5. Inferred changes in neural rhythm after aperiodic power correction.** (A) Example of correction process. From left to right: raw spectrogram from patient 1; output of Eq (2) at each time point after fitting to data; output of Eq (2) with  $b_i = 0$  for  $i = 1,2,3$ , i.e. the aperiodic component of the model; the corrected spectrogram for patient 1, defined as the raw spectrogram divided by the aperiodic power estimated by the model. Note: the colour scale in each individual plot was chosen to maximize contrast, and thus colours are not directly comparable between plots. (B) The estimated aperiodic component averaged across all patients. There is a decrease in power above 20 Hz around LOC, indicated by the hue turning darker blue. The lighter hues at low frequencies indicates an increase in low frequency power. Together, this indicates a rotation of the aperiodic component, as seen in Figure 4. (C) Time course of the parameter estimates for  $\tau_T^{decay}$  and (D)  $\Lambda_{AP}$ . (E) Group-averaged raw power spectrum. (F) Time course of power in delta (0.5-3 Hz), alpha (8-15 Hz) and beta (20-30 Hz) bands of the raw spectra; same as Figure 1C. (G) Same as in panel F, but plotted against rescaled time so that the time of infusion and LOC are aligned across all patients. (H) Group-averaged model-corrected spectrogram. (I) Same as in panel F, but for the model-corrected spectra. (J) Same as in panel G, but for the model-corrected spectra.

239  
240  
241  
242  
243  
244

oscillations while correcting for anticipated changes in asynchronous neural activity. Fitting our model, given by Eq. (2), to 2 s non-overlapping windows of patients' spectrograms produced good matches with the data (e.g. Figure 5A). The spectrograms of each patient were then split into periodic and aperiodic components power (Figure 5A). The aperiodic power was defined as the output of the fitted model with the amplitude of oscillations set to zero (i.e.  $b_i = 0$ , for  $i = 1,2,3$ ). By removing the estimated aperiodic power at each time

245 point from the original power spectrum, we were left with the predicted power from neural  
246 rhythms, referred to hereafter as the model-corrected spectrogram.

247 As expected, the group averaged aperiodic power component demonstrated a  
248 gradual rotation starting shortly before LOC (Figure 5B). Consistent with our previous  
249 results (Figure 4), this temporally-resolved rotation was associated with a gradual increase  
250 in  $\tau_I^{decay}$  and a decrease in  $\Lambda_{AP}$  (Figure 5C, D).

251 We next compared the changes in neural rhythms predicted by the uncorrected, raw  
252 spectrogram (Figure 5E-G) and the model-corrected spectrogram (Figure 5H-J). Unlike the  
253 raw spectrogram (Figure 5F), the model-corrected spectrogram indicated that alpha, beta,  
254 and delta rhythms appeared at distinct times (Figure 5I). Specifically, although both alpha  
255 and beta power increased with a similar time course, the increase in delta power was  
256 delayed (Figure 5I). Furthermore, whereas the increase in delta power was sudden, the  
257 increase in alpha and beta power was gradual as in the uncorrected spectrogram (Figure F,  
258 I). We hypothesized that this gradual increase was because the latency from propofol  
259 infusion to LOC was variable across patients. To test this, we rescaled time for each patient  
260 by dividing LOC-aligned time by the individual latencies to LOC. As expected, following  
261 time rescaling, alpha and beta power increased sharply in both the model-corrected and  
262 uncorrected spectra (Figure 5G, J). This observation suggests that the appearance of alpha  
263 and beta rhythms is more temporally related to the infusion of propofol than the moment of  
264 LOC, unlike delta rhythms which were more closely associated with the moment of LOC.

265 Interestingly, in the raw spectrogram, beta power began decreasing around halfway  
266 between propofol infusion and LOC (Figure 5G), eventually producing a beta power not  
267 statistically different from baseline 10-30 s post-LOC ( $p = 0.39$ , sign test). In contrast, the  
268 model-corrected analysis attributes this decrease in the beta band to a broadband decrease in  
269 high frequency power caused by a drop in  $\Lambda_{AP}$ . Consequently, the model indicated that beta  
270 rhythms actually remain elevated above baseline following LOC ( $p < 10^{-4}$ , sign test).  
271 Furthermore, in the model-corrected spectra, alpha and beta power appeared linearly  
272 correlated throughout the experiment ( $R^2 = 0.66$ ), which was not apparent in the  
273 uncorrected spectra (Figure 5F, G). This correlation suggested that differences in their time  
274 courses may be a spurious consequence of aperiodic changes in the EEG.

275 Finally, as observed with LOC-aligned time, correcting for aperiodic changes had a  
276 significant effect on the inferred time course of delta rhythms. In the raw spectra, delta  
277 power began increasing gradually around halfway between propofol infusion and LOC  
278 (Figure 5G). The model-corrected spectra attributed this slow increase in delta band power  
279 to a broadband increase in low frequency power caused by the slowing of IPSP decay.  
280 Thus, the model-corrected spectrogram predicts that delta rhythms remain constant until the  
281 moment of LOC, at which point they appear suddenly (Figure 5J). In summary, correcting  
282 the EEG spectrograms for aperiodic power altered the inferred time courses of neural  
283 rhythms, indicating that the alpha/beta rhythm induced by propofol plateaus prior to LOC,  
284 while the moment of LOC is uniquely associated with the appearance of delta rhythms.

## 285 286 Discussion

287 In the present study, we provided theoretical evidence that propofol leads to aperiodic  
288 changes in EEG power spectra at frequencies that overlap with neural oscillations. Our  
289 results present a physiological explanation for the broadband EEG changes we observed in  
290 humans undergoing LOC from propofol and further demonstrate how these broadband  
291 changes alter our understanding of the neural oscillations related to LOC.

## 292 293 **A model for the aperiodic component of the EEG**

294 Generally, identifying oscillations in a noisy signal requires some knowledge of the  
295 statistical properties of the noise. The noise in EEG, i.e. the aperiodic component of the  
296 signal, has previously been identified with the empirical 1/f trend observed in the power  
297 spectrum (Buzsaki and Draguhn, 2004; Demanuele et al., 2007; Donoghue et al., 2020).  
298 Although our data displayed an obvious 1/f trend, removing this trend classified all low  
299 frequency power as aperiodic, an interpretation of the data which contrasted with the time  
300 series behaviour (Figure 2). Indeed, the existence of slow neural oscillations in  
301 anaesthetized animals has been widely established, both in EEG and LFP studies, as well as  
302 intracellular recordings (Steriade et al., 1993a, b; Steriade, 2001). We concluded that the 1/f  
303 trend observed in our power spectra is at least partially supported by high amplitude, low  
304 frequency oscillations, and thus conflates power from both periodic and aperiodic neural  
305 activity.

306 Several past studies have postulated physiologically motivated models for the spectral  
307 trend that are not purely 1/f (Bédard et al., 2006; Miller et al., 2009; Gao et al., 2017). These  
308 studies generally made the same observation that exponential relaxations driven by random  
309 spiking display a power spectrum that decays as 1/f above a given frequency, but plateaus at  
310 lower frequencies, following a function sometimes called “Lorentzian”, i.e.  $P(f) \propto$   
311  $(1 + \tau f)^{-\beta}$ . Accordingly, the exponential decays of synaptic currents have been proposed  
312 to be a reasonable source of the spectral trend (Bédard et al., 2006; Miller et al., 2009; Gao  
313 et al., 2017). The present study concretizes this theory of EEG noise by directly estimating  
314 the magnitude of various electrical events to the extracellular field potential. Our results  
315 indicated that the overall trend in our data was consistent with these estimates, and  
316 furthermore that the effects of propofol observed by others at the molecular and cellular  
317 levels are quantitatively compatible with the precise changes we observed in the spectral  
318 trend following propofol administration.

319 Our modelling outcomes contrast with several past studies by attributing low  
320 frequency power in the EEG spectrum to inhibitory, rather than excitatory, synaptic  
321 transmission (Bédard et al., 2006; Miller et al., 2009). In this same respect, however, our  
322 results validated the model of Gao et al. (2017), which assumed a similar baseline ratio of  
323 excitation to inhibition to that produced by our model. Nonetheless, our interpretations of  
324 the broadband changes caused by propofol differed. While Gao et al. (2017) attributed the  
325 steepening of the spectral trend between 30-50 Hz to propofol’s potentiation of IPSC  
326 amplitude, this mechanism did not consider the decrease in firing frequency caused by  
327 propofol. We found that the combined effect of propofol on frequency and amplitude led  
328 only to a net scaling of 140%, which alone was insufficient to cause the increase in low  
329 frequency power observed following propofol infusion (Figure 3). Rather, we found that  
330 propofol’s effect on IPSC decay contributed the most to altering the power spectrum.

331 Interestingly, because IPSC scaling affected the power spectrum differently than changing  
332 the time constant of decay (Figure 4), it is theoretically possible to steepen the spectral trend  
333 while maintaining a given excitatory/inhibitory ratio (an example of this is shown in  
334 FigureS5). However, we do not contend that this is the case for propofol.

335 Our model departed from these previous models by including not just synaptic events,  
336 but also the explicit contribution of APs. Our results indicated that mean spiking rates were  
337 inferable from the EEG signal, as has been previously demonstrated for LFP recordings  
338 (Manning et al., 2009; Miller et al., 2009; Buzsaki et al., 2012), although invasive  
339 experiments are needed to confirm this. Notably, others have attributed decreases in high  
340 frequency power following propofol administration to a decrease in gamma rhythms (Ching  
341 et al., 2010; Purdon et al., 2013). The decrease in power we observed was not confined to  
342 the gamma range, and in fact extended to the highest frequencies we recorded (Figure 1).  
343 We find it is unlikely, therefore, that the parameter  $\Lambda_{AP}$  reflects changes in gamma rhythms.

344 A final theory of EEG noise have posited that the decaying spectral trend arose from  
345 low pass filtering effects, such as that from the passive diffusion of synaptic potentials  
346 along dendrites (Lindén et al., 2010; Buzsaki et al., 2012). Although we found that the time  
347 scales of synaptic activity were sufficient to explain the trend in our data, filtering effects  
348 could potentially compound with this trend, leading to steeper spectral slopes than those  
349 observed here.

## 350 **Neural oscillations related to LOC**

351 Many previous studies of propofol-induced rhythms have not considered changes in  
352 aperiodic power when interpreting EEG spectra. Consequently, these studies assumed that  
353 all spectral changes reflected differences in neural rhythms. Although correcting for  
354 estimated aperiodic changes in the EEG indicated rhythmic power in approximately the  
355 same frequency bands as these past studies, it led to important distinctions in the time  
356 course of these rhythms.

357 Increases in delta power have been widely reported during propofol-induced  
358 anesthesia (Gugino et al., 2001; Chen et al., 2010; Murphy et al., 2011; Kortelainen et al.,  
359 2017). However, the abrupt change observed here has not, to the best of our knowledge,  
360 been previously reported in EEG studies, even when the moment of LOC was resolved with  
361 high temporal precision (Purdon et al., 2013). We propose that this is because our method of  
362 detrending power spectra removes changes in low frequency power attributable to slow  
363 changes in IPSP dynamics, which would otherwise be included as oscillatory power.  
364 Interestingly, LFP recordings in non-human primates indicated that propofol-induced delta  
365 power was tightly correlated with the moment of LOC in the thalamus (Bastos et al., 2021).  
366 Thalamic neurons are intrinsically prone to switching from spiking to bursting upon  
367 hyperpolarization, a feature that is thought to give rise to the delta rhythm seen in EEG  
368 signals (Steriade et al., 1993b; Steriade, 2001). The observed sharp increase in delta  
369 rhythms following spectral detrending in this study is consistent with such a binary  
370 switching in firing pattern, and suggests that the detrended power spectrum is more  
371 consistent with the underlying physiology than the uncorrected spectrogram.

372 Increases in beta power have been previously observed with low doses of propofol  
373 and were associated with the behavioural phenomenon labelled “paradoxical excitability”

(Gugino et al., 2001; McCarthy et al., 2008; Ching et al., 2010; Brown et al., 2011). In this study, we also observed an increase in beta power at low concentrations of propofol. Although this increase in beta band power was subsequently followed by a decrease as propofol concentration rose, our analysis suggested that this phenomenon was due to broadband changes in high frequency power caused by decreasing neuronal activity. Whereas past studies have reported a “slowing” of beta rhythms into alpha rhythms (Ching et al., 2010; Purdon et al., 2013), we did not observe this phenomenon after correcting for changes in aperiodic power. Rather, we found that both alpha and beta power appeared at similar times and were tightly correlated throughout LOC. Overall, these results are consistent with the idea that propofol-induced alpha and beta power reflect a single physiological phenomenon (McCarthy et al., 2008; Purdon et al., 2013), but suggest that this phenomenon remains relatively static during LOC.

Frontal alpha rhythms are seemingly unique to anesthetics targeting GABA<sub>A</sub> receptors (Gugino et al., 2001; Murphy et al., 2011; Purdon et al., 2013; Huupponen et al., 2008; Akeju et al., 2014; Ma and Leung, 2006; Johnson et al., 2003). The emergence of these alpha rhythms has been correlated with the moment of propofol-induced LOC (Ching et al., 2010; Purdon et al., 2013). In contrast, here we observed that the power in this frequency band emerged and plateaued prior to LOC. Notably, we found that this time course was similar in both our model-corrected and baseline-normalized analysis. This inconsistency could be due to the fixed rate of propofol infusion administered here, compared to the target effect-site concentration protocol applied in past studies. Consequently, our analysis of spectral changes pertains to a much shorter time scale of minutes as opposed to hours. Additionally, LOC is marked in this study by the dropping of a held object, unlike past studies that have used auditory stimuli. Our study thus specifically demonstrates that the appearance of alpha rhythms is not an indicator of loss of volitional muscle control. This, however, does not necessarily preclude a role for alpha rhythms in other features of propofol-induced anesthesia.

Overall, our results indicate that there is a clear temporal separation between the appearance of alpha/beta rhythms and delta rhythms during fast induction of LOC with propofol. This observation leads us to conclude that propofol-induced LOC is uniquely associated with the appearance of delta rhythms, consistent with a switching in the thalamo-cortical networks from tonic firing to bursting mode (Steriade, 2001). Our results may indicate that there are sub-anesthetic doses of propofol at which alpha rhythms exists in the absence of delta rhythms. If so, this phenomenon could be used in future studies to isolate and further assess the functional significance of propofol-induced alpha rhythms.

## Methods

### Subjects, EEG recording and anesthetic care

Following MNH Ethics Board approval, we recruited 16 American Society of Anesthesiologists (ASA) class I or II patients (18-65 years old) presenting for lumbar disk surgery as well as 11 control subjects who received no medication. Patients were informed beforehand of the procedures and practiced holding the object. Gold cup electrodes (Fz, Cz,

417 Pz, C3, C4, CP3, CP4, M2 as reference; FC1 as ground; impedance  $\leq 5$  kOhm) were glued  
418 to the scalp to obtain a continuous EEG recording, which was amplified with a 0.1-300 Hz  
419 band pass and digitized at 1024 Hz. The standards of care of the Canadian  
420 Anesthesiologists' Society in regard to monitoring, equipment and care provider were  
421 rigorously applied. All medications were given intravenously via a catheter placed on the  
422 non-dominant arm.

423 For each patient, we obtained 2 minutes of recording during preoxygenation with eyes  
424 closed. The patient was then asked to hold the object (0.5 kg cylinder; 2.5 cm diameter and  
425 15 cm long) in a vertical position with their dominant hand and to keep the eyes closed. The  
426 electromyogram (EMG) from the flexor digitorum superficialis and extensor carpi radialis  
427 forearm muscle was recorded to monitor the holding ability. Preoxygenation continued for  
428 another 2 minutes. Lidocaine 2% (40 mg) was given to attenuate the discomfort caused by  
429 the propofol injection. Propofol was given at the rate of 1mg/kg/min and maintained until  
430 the cylinder fell from the patient's hand. Gentle jaw lift was applied if needed to relieve  
431 airway obstruction after loss of consciousness. The ability of the patient to respond to loud  
432 verbal command was assessed 60 seconds after the fall of the object and the study was then  
433 terminated. Two patients were excluded because of failure to comply with the instructions  
434 during induction. One patient kept talking, the other kept moving his dominant arm. The  
435 final data set was therefore based on 14 patients (10 men; 12 right-handed). Their age and  
436 body mass index (BMI) were (mean  $\pm$  standard deviation)  $47.0 \pm 11.1$  years and  $26.5 \pm 3.2$   
437  $\text{kg/m}^2$ , respectively. They all appeared to be asleep immediately after the fall of the object,  
438 with the hand that was holding the object lying immobile. The median duration of the  
439 propofol infusion was 135 seconds (range: 95-285), corresponding to a median induction  
440 dose of 2.25 mg/kg. Gentle jaw lift was required for 6 patients to relieve upper airway  
441 obstruction. Assessment of response to commands 60 seconds after object fall elicited no  
442 response or any other form of movement. All 11 controls (6 men) performed the task  
443 correctly. Their age and BMI were  $22.5 \pm 5.2$  years and  $23.8 \pm 4.0$   $\text{kg/m}^2$ , respectively.

444

## 445 **Data analysis**

446 Spectrograms were computed using the Fast Fourier Transform in 2 second windows with  
447 1.9 s overlap, following the application of a Hamming window. Spectral exponent  
448 estimation was done using the Python implementation of the FOOOF package (Donoghue et  
449 al. 2020) (FOOOF 1.0.0 executed from Python 3.8.10). All reported values and error bars  
450 are given as mean  $\pm$  S.E. However, shading around lines in plots, e.g. Figure 1D, represent  
451 95% confidence intervals of the mean.

452 Patient #14 did not display a rotation in their EEG power spectrum following LOC,  
453 unlike the other patients. Rather high frequency power increased following LOC.  
454 Accordingly, this patient was identified as an outlier by Grubb's test on the post-LOC  $\Lambda_{AP}$   
455 parameter estimates (fold  $\Lambda_{AP}$  change for patient 14 was 4.02; *c.f.* Figure 4D). We thus  
456 excluded this patient in the analyses presented in Figures 4 and 5.

457

## 458 **Parameter values**

459 Since excitatory cells are thought to account for 85% of cortical neurons (Markram et al.,  
 460 2015), we simply used parameters from morphological studies on pyramidal cells to  
 461 determine the average number of synapses per cortical cell. The number of terminal  
 462 dendrite segments is equal to 1 more than the number of dendritic branch points, which in  
 463 L2/L3 neurons has been estimated to be about 50 (Mohan et al., 2015). The average  
 464 segment length was taken to be about 150  $\mu\text{m}$  (Mohan et al., 2015; Benavides-Piccione et  
 465 al., 2020; Benavides-Piccione et al., 2021). The values presented in Table 1 for  $N_E$  and  $N_I$   
 466 were finally computed by considering a distal excitatory synapse density of  $1/\mu\text{m}$  and distal  
 467 inhibitory synapse density of  $0.2/\mu\text{m}$  (Karimi et al., 2020).

468 The rate of spontaneous EPSPs was calculated by multiplying the rate of spontaneous  
 469 AP firing in excitatory cells ( $\lambda_{AP}$ , Table 1) by a synaptic transmission failure rate of 0.3  
 470 (Allen and Stevens, 1994). Similarly, the rate of spontaneous IPSPs was calculated by  
 471 multiplying the same rate of transmission failure of 0.3 by a spontaneous firing rate for  
 472 interneurons of 6 Hz (Gentet et al. 2012).

473 To calculate the number of afferent axons per cells, we used the estimate of 30,000  
 474 excitatory synapses per cell (Eyal et al., 2018), and 3.6 synapses/connection (Markram et  
 475 al., 2015), to arrive at  $\sim 8,500$  connections/cell. Finally, the parameters  $\gamma_{AP}$ ,  $\tau_{AP}^1$ , and  $\tau_{AP}^2$   
 476 were chosen such that simulating an action potential produced a membrane potential  
 477 waveform with physiologically realistic amplitude and time scale (Figure S3).

## 478 **Model fitting**

480 To account for the decay at high frequencies in the data, which likely reflects a combination  
 481 of high frequency neural noise and amplifier filtering, Eq. (2) was scaled by

$$482 \quad A(f) = (1 + 2\pi i(f/f_s)^n)^{-1},$$

483 during parameter estimation (i.e. Figure 4 and 5), where  $f_s$  and  $n$  are fitted parameters that  
 484 did not possess any physiological interpretation. Specifically, the following equation was  
 485 used to estimate parameters from data

$$486 \quad \log|\hat{\phi}_{EEG}(f)|^2 = 2 \log|A(f; f_s, n)|$$

$$487 \quad + \log \left[ \Lambda_I \left( 1 + \sum_{i=1}^3 b_i \cdot g_i(f; \mu_i, \sigma_i^2) \right) |\hat{\alpha}_I(f; \tau_I^{rise}, \tau_I^{decay})|^2 + \Lambda_{AP} \right]$$

488 Parameter estimation was performed using a custom written evolutionary-type  
 489 algorithm with the fitness function

$$490 \quad err(\Theta) = \sum_i \frac{(\log Y_i - \log F(f_i; \Theta))^2}{f_i}$$

491 where  $Y_i$  is the observed power at frequency  $f_i$  (ranging from 0.5 to 250 Hz) and  $F(f_i; \Theta)$  is  
 492 the model output for parameter set  $\Theta =$

493  $\{\Lambda_I, \Lambda_{AP}, \tau_I^{rise}, \tau_I^{decay}, b_1, \mu_1, \sigma_1, b_2, \mu_2, \sigma_2, b_3, \mu_3, \sigma_3, f_s, n\}$ . To ensure that the decay at low  
 494 frequencies was not captured by the function  $A(f)$ , the parameter  $f_s$  was constrained to be  
 495 greater than 200 Hz.



496 The spectrograms were fit in 5 second intervals with 50% overlap, providing  
497 parameter estimates for each patient every 2.5 seconds. For the baseline and post-LOC  
498 parameters (e.g. Figure 4), the median was taken of these parameters either prior to propofol  
499 infusion, or 0-60 seconds following LOC, respectively.

## 500 **Code availability**

501 Unless otherwise stated, all data analysis and model implementation was performed in  
502 MATLAB 2017b (Mathworks, Natick, MA). All code used for data analysis and figure  
503 generation are made available at [github.com/niklasbrake/Propofol2021](https://github.com/niklasbrake/Propofol2021). All data will be  
504 made available upon request.  
505

## 506 **Acknowledgements**

507 **Funding:** This work was supported by the Natural Sciences and Engineering Research  
508 Council of Canada ([https://www.nserc-crsng.gc.ca/index\\_eng.asp](https://www.nserc-crsng.gc.ca/index_eng.asp)) discovery grant to  
509 Anmar Khadra. The funders had no role in study design, data collection and analysis,  
510 decision to publish, or preparation of the manuscript.  
511  
512

## 513 **Authors' contribution**

514 **Conceptualization:** Niklas Brake.

515 **Data curation:** Flavie Duc, Alexander Rokos, Francis Arseneau, Shiva Shahiri, Gilles  
516 Plourde.

517 **Formal analysis:** Niklas Brake.

518 **Funding acquisition:** Anmar Khadra, Gilles Plourde.

519 **Investigation:** Niklas Brake, Anmar Khadra, Gilles Plourde.

520 **Methodology:** Niklas Brake.

521 **Project administration:** Anmar Khadra, Gilles Plourde.

522 **Resources:** Anmar Khadra, Gilles Plourde.

523 **Supervision:** Anmar Khadra, Gilles Plourde.

524 **Validation:** Niklas Brake, Anmar Khadra, Gilles Plourde.

525 **Visualization:** Niklas Brake.

526 **Writing – original draft:** Niklas Brake.

527 **Writing – review & editing:** Niklas Brake, Anmar Khadra, Gilles Plourde.  
528

## 529 **References**

- 530  
531 Akeju O, Pavone KJ, Westover MB, Vazquez R, Prerau MJ, Harrell PG, Hartnack KE, Rhee  
532 J, Sampson AL, Habeeb K, Lei G, Pierce ET, Walsh JL, Brown EN, Purdon PL. 2014.  
533 A comparison of propofol- and dexmedetomidine-induced electroencephalogram  
534 dynamics using spectral and coherence analysis. *Anesthesiology* **121**:978–989.  
535 doi:10.1097/ALN.0000000000000419

- 536 Allen C, Stevens CF. 1994. An evaluation of causes for unreliability of synaptic  
537 transmission. *Proc Natl Acad Sci* **91**:10380–10383. doi:10.1073/pnas.91.22.10380
- 538 Amzica F, Steriade M. 1998. Electrophysiological correlates of sleep delta waves.  
539 *Electroencephalogr Clin Neurophysiol* **107**:69–83. doi:10.1016/S0013-4694(98)00051-  
540 0
- 541 Arancibia-Cárcamo IL, Ford MC, Cossell L, Ishida K, Tohyama K, Attwell D. 2017. Node  
542 of ranvier length as a potential regulator of myelinated axon conduction speed. *Elife* **6**.  
543 doi:10.7554/eLife.23329
- 544 Bastos AM, Donoghue JA, Brincat SL, Mahnke M, Yanar J, Correa J, Waite AS, Lundqvist  
545 M, Roy J, Brown EN, Miller EK. 2021. Neural effects of propofol-induced  
546 unconsciousness and its reversal using thalamic stimulation. *Elife* **10**.  
547 doi:10.7554/ELIFE.60824
- 548 Bédard C, Kröger H, Destexhe A. 2006. Does the 1/f frequency scaling of brain signals  
549 reflect self-organized critical states? *Phys Rev Lett* **97**.  
550 doi:10.1103/PhysRevLett.97.118102
- 551 Benavides-Piccione R, Rojo C, Kastanauskaite A, DeFelipe J. 2021. Variation in Pyramidal  
552 Cell Morphology Across the Human Anterior Temporal Lobe. *Cereb Cortex* **31**:3592–  
553 3609. doi:10.1093/cercor/bhab034
- 554 Buzsáki G, Anastassiou CA, Koch C. 2012. The origin of extracellular fields and currents-  
555 EEG, ECoG, LFP and spikes. *Nat Rev Neurosci* **13**:407–420. doi:10.1038/nrn3241
- 556 Buzsáki G, Draguhn A. 2004. Neuronal oscillations in cortical networks. *Science* **304**:1926–  
557 1929. doi:10.1126/science.1099745
- 558 Ching S, Cimenser A, Purdon PL, Brown EN, Kopell NJ. 2010. Thalamocortical model for a  
559 propofol-induced  $\alpha$ -rhythm associated with loss of consciousness. *Proc Natl Acad Sci U*  
560 *SA* **107**:22665–22670. doi:10.1073/pnas.1017069108
- 561 Colombo MA, Napolitani M, Boly M, Gosseries O, Casarotto S, Rosanova M, Bricchant JF,  
562 Boveroux P, Rex S, Laureys S, Massimini M, Chiergato A, Sarasso S. 2019. The  
563 spectral exponent of the resting EEG indexes the presence of consciousness during  
564 unresponsiveness induced by propofol, xenon, and ketamine. *Neuroimage* **189**:631–  
565 644. doi:10.1016/j.neuroimage.2019.01.024
- 566 Cosandier-Rimélé D, Badier JM, Chauvel P, Wendling F. 2007. A physiologically plausible  
567 spatio-temporal model for EEG signals recorded with intracerebral electrodes in human  
568 partial epilepsy. *IEEE Trans Biomed Eng* **54**:380–388.  
569 doi:10.1109/TBME.2006.890489

- 570 Crunelli V, Hughes SW. 2010. The slow (1 Hz) rhythm of non-REM sleep: A dialogue  
571 between three cardinal oscillators. *Nat Neurosci* **13**:9–17. doi:10.1038/nn.2445
- 572 Cummings GC, Dixon J, Kay NH, Windsor JPW, Major E, Morgan M, Sear JW, Spence  
573 AA, Stephenson DK. 1984. Dose requirements of ICI 35,868 (Propofol, ‘Diprivan’) in a  
574 new formulation for induction of anaesthesia. *Anaesthesia* **39**:1168–1171.  
575 doi:10.1111/j.1365-2044.1984.tb06425.x
- 576 Demanuele C, James CJ, Sonuga-Barke EJS. 2007. Distinguishing low frequency  
577 oscillations within the 1/f spectral behaviour of electromagnetic brain signals. *Behav*  
578 *Brain Funct* **3**. doi:10.1186/1744-9081-3-62
- 579 Donoghue T, Haller M, Peterson EJ, Varma P, Sebastian P, Gao R, Noto T, Lara AH, Wallis  
580 JD, Knight RT, Shestyuk A, Voytek B. 2020. Parameterizing neural power spectra into  
581 periodic and aperiodic components. *Nat Neurosci* **23**:1655–1665. doi:10.1038/s41593-  
582 020-00744-x
- 583 Eyal G, Verhoog MB, Testa-Silva G, Deitcher Y, Lodder JC, Benavides-Piccione R,  
584 Morales J, Defélope J, de Kock CPJ, Mansvelder HD, Segev I. 2016. Unique membrane  
585 properties and enhanced signal processing in human neocortical neurons. *Elife* **5**.  
586 doi:10.7554/eLife.16553
- 587 Feshchenko VA, Veselis RA, Reinsel RA. 2004. Propofol-induced alpha rhythm.  
588 *Neuropsychobiology* **50**:257–266. doi:10.1159/000079981
- 589 Gao R, Peterson EJ, Voytek B. 2017. Inferring synaptic excitation/inhibition balance from  
590 field potentials. *Neuroimage* **158**:70–78. doi:10.1016/j.neuroimage.2017.06.078
- 591 Gent TC, Bandarabadi M, Herrera CG, Adamantidis AR. 2018. Thalamic dual control of  
592 sleep and wakefulness. *Nat Neurosci* **21**:974–984. doi:10.1038/s41593-018-0164-7
- 593 Gentet LJ, Kremer Y, Taniguchi H, Huang ZJ, Staiger JF, Petersen CCH. 2012. Unique  
594 functional properties of somatostatin-expressing GABAergic neurons in mouse barrel  
595 cortex. *Nat Neurosci* **15**:607–612. doi:10.1038/nn.3051
- 596 Gentet LJ, Stuart GJ, Clements JD. 2000. Direct measurement of specific membrane  
597 capacitance in neurons. *Biophys J* **79**:314–320. doi:10.1016/S0006-3495(00)76293-X
- 598 Guay CS, Plourde G. 2019. Handgrip dynamometry for continuous assessment of volitional  
599 control during induction of anesthesia: a prospective observational study. *Can J Anesth*  
600 **66**:48–56. doi:10.1007/s12630-018-1224-x
- 601 Gugino LD, Chabot RJ, Prichep LS, John ER, Formanek V, Aglio LS. 2001. Quantitative  
602 EEG changes associated with loss and return of consciousness in healthy adult  
603 volunteers anaesthetized with propofol or sevoflurane. *Br J Anaesth* **87**:421–428.  
604 doi:10.1093/bja/87.3.421

- 605 He BJ. 2014. Scale-free brain activity: Past, present, and future. *Trends Cogn Sci* **18**:480–  
606 487. doi:10.1016/j.tics.2014.04.003
- 607 Huupponen E, Maksimow A, Lapinlampi P, Särkelä M, Saastamoinen A, Snapir A, Scheinin  
608 H, Scheinin M, Meriläinen P, Himanen SL, Jääskeläinen S. 2008.  
609 Electroencephalogram spindle activity during dexmedetomidine sedation and  
610 physiological sleep. *Acta Anaesthesiol Scand* **52**:289–294. doi:10.1111/j.1399-  
611 6576.2007.01537.x
- 612 Johnson BW, Sleight JW, Kirk IJ, Williams ML. 2003. High-density EEG mapping during  
613 general anaesthesia with Xenon and propofol: A pilot study. *Anaesth Intensive Care*  
614 **31**:155–163. doi:10.1177/0310057x0303100203
- 615 Kitamura A, Marszalec W, Yeh JZ, Narahashi T. 2003. Effects of halothane and propofol on  
616 excitatory and inhibitory synaptic transmission in rat cortical neurons. *J Pharmacol Exp*  
617 *Ther* **304**:162–171. doi:10.1124/jpet.102.043273
- 618 Kortelainen J, Väyrynen E, Huuskonen U, Laurila J, Koskenkari J, Backman JT, Alahuhta S,  
619 Seppänen T, Ala-Kokko T. 2017. Pilot Study of Propofol-induced Slow Waves as a  
620 Pharmacologic Test for Brain Dysfunction after Brain Injury. *Anesthesiology* **126**:94–  
621 103. doi:10.1097/ALN.0000000000001385
- 622 Larkum ME, Zhu JJ, Sakmann B. 1999. A new cellular mechanism for coupling inputs  
623 arriving at different cortical layers. *Nature* **398**:338–341. doi:10.1038/18686
- 624 Le Masson G, Renaud-Le Masson S, Debay D, Bal T. 2002. Feedback inhibition controls  
625 spike transfer in hybrid thalamic circuits. *Nature* **417**:854–858.  
626 doi:10.1038/nature00825
- 627 Lendner JD, Helfrich RF, Mander BA, Romundstad L, Lin JJ, Walker MP, Larsson PG,  
628 Knight RT. 2020. An electrophysiological marker of arousal level in humans. *Elife* **9**:1–  
629 29. doi:10.7554/eLife.55092
- 630 Lewis LD, Weiner VS, Mukamel EA, Donoghue JA, Eskandar EN, Madsen JR, Anderson  
631 WS, Hochberg LR, Cash SS, Brown EN, Purdon PL. 2012. Rapid fragmentation of  
632 neuronal networks at the onset of propofol-induced unconsciousness. *Proc Natl Acad*  
633 *Sci U S A* **109**. doi:10.1073/pnas.1210907109
- 634 Lindén H, Pettersen KH, Einevoll GT. 2010. Intrinsic dendritic filtering gives low-pass  
635 power spectra of local field potentials. *J Comput Neurosci* **29**:423–444.  
636 doi:10.1007/s10827-010-0245-4
- 637 Ma J, Leung LS. 2006. Limbic system participates in mediating the effects of general  
638 anesthetics. *Neuropsychopharmacology* **31**:1177–1192. doi:10.1038/sj.npp.1300909

- 639 Manning JR, Jacobs J, Fried I, Kahana MJ. 2009. Broadband shifts in local field potential  
640 power spectra are correlated with single-neuron spiking in humans. *J Neurosci*  
641 **29**:13613–13620. doi:10.1523/JNEUROSCI.2041-09.2009
- 642 Manns ID, Sakmann B, Brecht M. 2004. Sub- and suprathreshold receptive field properties  
643 of pyramidal neurones in layers 5A and 5B of rat somatosensory barrel cortex. *J Physiol*  
644 **556**:601–622. doi:10.1113/jphysiol.2003.053132
- 645 Markram H, Muller E, Ramaswamy S, Reimann MW, Abdellah M, Sanchez CA, Ailamaki  
646 A, Alonso-Nanclares L, Antille N, Arsever S, Kahou GAA, Berger TK, Bilgili A,  
647 Buncic N, Chalimourda A, Chindemi G, Courcol JD, Delalondre F, Delattre V,  
648 Druckmann S, Dumusc R, Dynes J, Eilemann S, Gal E, Gevaert ME, Ghobril JP, Gidon  
649 A, Graham JW, Gupta A, Haenel V, Hay E, Heinis T, Hernando JB, Hines M, Kanari L,  
650 Keller D, Kenyon J, Khazen G, Kim Y, King JG, Kisvarday Z, Kumbhar P, Lasserre S,  
651 Le Bé JV, Magalhães BRC, Merchán-Pérez A, Meystre J, Morrice BR, Muller J,  
652 Muñoz-Céspedes A, Muralidhar S, Muthurasu K, Nachbaur D, Newton TH, Nolte M,  
653 Ovcharenko A, Palacios J, Pastor L, Perin R, Ranjan R, Riachi I, Rodríguez JR,  
654 Riquelme JL, Rössert C, Sfyarakis K, Shi Y, Shillcock JC, Silberberg G, Silva R,  
655 Tauheed F, Telefont M, Toledo-Rodriguez M, Tränkler T, Van Geit W, Díaz JV,  
656 Walker R, Wang Y, Zaninetta SM, Defelipe J, Hill SL, Segev I, Schürmann F. 2015.  
657 Reconstruction and Simulation of Neocortical Microcircuitry. *Cell* **163**:456–492.  
658 doi:10.1016/j.cell.2015.09.029
- 659 McCarthy MM, Brown EN, Kopell N. 2008. Potential network mechanisms mediating  
660 electroencephalographic beta rhythm changes during propofol-induced paradoxical  
661 excitation. *J Neurosci* **28**:13488–13504. doi:10.1523/JNEUROSCI.3536-08.2008
- 662 Miller KJ, Sorensen LB, Ojemann JG, Den Nijs M. 2009. Power-law scaling in the brain  
663 surface electric potential. *PLoS Comput Biol* **5**. doi:10.1371/journal.pcbi.1000609
- 664 Murphy M, Bruno MA, Riedner BA, Boveroux P, Noirhomme Q, Landsness EC, Bricchant  
665 JF, Phillips C, Massimini M, Laureys S, Tononi G, Boly M. 2011. Propofol anesthesia  
666 and sleep: A high-density EEG study. *Sleep* **34**:283–291. doi:10.1093/sleep/34.3.283
- 667 Ogilvie RD. 2001. The process of falling asleep. *Sleep Med Rev* **5**:247–270.  
668 doi:10.1053/smr.2001.0145
- 669 Orser BA, Wang LY, Pennefather PS, MacDonald JF. 1994. Propofol modulates activation  
670 and desensitization of GABA(A) receptors in cultured murine hippocampal neurons. *J*  
671 *Neurosci* **14**:7747–7760. doi:10.1523/jneurosci.14-12-07747.1994
- 672 Prerau MJ, Brown RE, Bianchi MT, Ellenbogen JM, Purdon PL. 2017. Sleep  
673 neurophysiological dynamics through the lens of multitaper spectral analysis.  
674 *Physiology* **32**:60–92. doi:10.1152/physiol.00062.2015

- 675 Purdon PL, Pierce ET, Mukamel EA, Prerau MJ, Walsh JL, Wong KFK, Salazar-Gomez AF,  
676 Harrell PG, Sampson AL, Cimenser A, Ching S, Kopell NJ, Tavares-Stoeckel C,  
677 Habeeb K, Merhar R, Brown EN. 2013. Electroencephalogram signatures of loss and  
678 recovery of consciousness from propofol. *Proc Natl Acad Sci U S A* **110**:E1142–E1151.  
679 doi:10.1073/pnas.1221180110
- 680 Redinbaugh MJ, Phillips JM, Kambi NA, Mohanta S, Andryk S, Dooley GL, Afrasiabi M,  
681 Raz A, Saalman YB. 2020. Thalamus Modulates Consciousness via Layer-Specific  
682 Control of Cortex. *Neuron* **106**:66–75.e12. doi:10.1016/j.neuron.2020.01.005
- 683 Soplata AE, McCarthy MM, Sherfey J, Lee S, Purdon PL, Brown EN, Kopell N. 2017.  
684 Thalamocortical control of propofol phase-amplitude coupling. *PLoS Comput Biol* **13**.  
685 doi:10.1371/journal.pcbi.1005879
- 686 Steriade M. 2001. Impact of network activities on neuronal properties in corticothalamic  
687 systems. *J Neurophysiol* **86**:1–39. doi:10.1152/jn.2001.86.1.1
- 688 Steriade M. 2000. Corticothalamic resonance, states of vigilance and mentation.  
689 *Neuroscience* **101**:243–276. doi:10.1016/S0306-4522(00)00353-5
- 690 Steriade M, Dossi RC, Nunez A. 1991. Network modulation of a slow intrinsic oscillation of  
691 cat thalamocortical neurons implicated in sleep delta waves: Cortically induced  
692 synchronization and brainstem cholinergic suppression. *J Neurosci* **11**:3200–3217.  
693 doi:10.1523/jneurosci.11-10-03200.1991
- 694 Steriade M, Nunez A, Amzica F. 1993. Intracellular analysis of relations between the slow  
695 (<1 Hz) neocortical oscillation and other sleep rhythms of the electroencephalogram. *J*  
696 *Neurosci* **13**:3266–3283. doi:10.1523/jneurosci.13-08-03266.1993
- 697 Steriade M, Nunez A, Amzica F. 1993. A novel slow (< 1 Hz) oscillation of neocortical  
698 neurons in vivo: Depolarizing and hyperpolarizing components. *J Neurosci* **13**:3252–  
699 3265. doi:10.1523/jneurosci.13-08-03252.1993
- 700 Stokes MG, Chambers CD, Gould IC, Henderson TR, Janko NE, Allen NB, Mattingley JB.  
701 2005. Simple metric for scaling motor threshold based on scalp-cortex distance:  
702 Application to studies using transcranial magnetic stimulation. *J Neurophysiol*  
703 **94**:4520–4527. doi:10.1152/jn.00067.2005
- 704 Terman D, Bose A, Kopell N. 1996. Functional reorganization in thalamocortical networks:  
705 Transition between spindling and delta sleep rhythms. *Proc Natl Acad Sci U S A*  
706 **93**:15417–15422. doi:10.1073/pnas.93.26.15417
- 707 Thomson AM, West DC, Hahn J, Deuchars J. 1996. Single axon IPSPs elicited in pyramidal  
708 cells by three classes of interneurons in slices of rat neocortex. *J Physiol* **496**:81–102.  
709 doi:10.1113/jphysiol.1996.sp021667

710 Whittington MA, Jefferys JGR, Traub RD. 1996. Effects of intravenous anaesthetic agents  
711 on fast inhibitory oscillations in the rat hippocampus in vitro. *Br J Pharmacol*  
712 **118**:1977–1986. doi:10.1111/j.1476-5381.1996.tb15633.x

713 Williams SR, Stuart GJ. 2002. Dependence of EPSP efficacy on synapse location in  
714 neocortical pyramidal neurons. *Science* **295**:1907–1910. doi:10.1126/science.1067903

715
